# Supplementary material for: Assessment of health care, hospital admissions, and mortality by ethnicity: population-based cohort study of health-system performance in Scotland
Source: PubMed Central journal article supplement (PMC5937910; doi:10.1016/s2468-2667(18)30068-9), 2018-04-21
Supplement: mmc1.pdf [file mmc1.pdf]

# THE LANCET

## Public Health

### Supplementary appendix

This appendix formed part of the original submission and has been peer reviewed. We post it as supplied by the authors.

Supplement to: Katikireddi SV, Cezard G, Bhopal RS, et al. Assessment of health care, hospital admissions, and mortality by ethnicity: population-based cohort study of health-system performance in Scotland. *Lancet Public Health* 2018; published online April 20. [http://dx.doi.org/10.1016/S2468-2667\(18\)30068-9](http://dx.doi.org/10.1016/S2468-2667(18)30068-9).

## **Web Appendix: Assessing equity of healthcare in ethnic minorities**

### **Contents**

1. Categorisation of amenable, preventable and avoidable causes of death
2. Categorisation of avoidable hospitalisations
3. Socio-demographic characteristics of analytical sample
4. Amenable mortality results
5. Amenable mortality (excluding IHD) results
6. Preventable mortality results
7. Avoidable mortality results
8. All avoidable hospitalisations results
9. Acute avoidable hospitalisations results
10. Chronic avoidable hospitalisations results
11. Unplanned readmissions results
12. Length of stay results

**Table 1: Causes of death (classified using the International Classification of Diseases, tenth revision) considered to be avoidable**

Avoidable deaths are those that are either amenable or preventable (all those listed below). Classification is based on underlying cause of death.

| Condition group and cause                            | ICD-10 codes                                     | Age  | Amenable | Preventable |
|------------------------------------------------------|--------------------------------------------------|------|----------|-------------|
| <b>Infections</b>                                    |                                                  |      |          |             |
| Tuberculosis                                         | A15-A19, B90                                     | 0-74 | •        | •           |
| Selected invasive bacterial and protozoal infections | A38-A41, A46, A48.1, B50-B54, G00, G03, J02, L03 | 0-74 | •        |             |
| Hepatitis C                                          | B17.1, B18.2                                     | 0-74 | •        | •           |
| HIV/AIDS                                             | B20-B24                                          | All  | •        | •           |
| <b>Neoplasms</b>                                     |                                                  |      |          |             |
| Malignant neoplasm of lip, oral cavity and pharynx   | C00-C14                                          | 0-74 |          | •           |
| Malignant neoplasm of oesophagus                     | C15                                              | 0-74 |          | •           |
| Malignant neoplasm of stomach                        | C16                                              | 0-74 |          | •           |
| Malignant neoplasm of colon and rectum               | C18-C21                                          | 0-74 | •        | •           |
| Malignant neoplasm of liver                          | C22                                              | 0-74 |          | •           |
| Malignant neoplasm of trachea, bronchus and lung     | C33-C34                                          | 0-74 |          | •           |
| Malignant melanoma of skin                           | C43                                              | 0-74 | •        | •           |
| Mesothelioma                                         | C45                                              | 0-74 |          | •           |
| Malignant neoplasm of breast                         | C50                                              | 0-74 | •        | •           |
| Malignant neoplasm of cervix uteri                   | C53                                              | 0-74 | •        | •           |
| Malignant neoplasm of bladder                        | C67                                              | 0-74 | •        |             |
| Malignant neoplasm of thyroid gland                  | C73                                              | 0-74 | •        |             |

|                                                     |                                                                           |      |   |   |
|-----------------------------------------------------|---------------------------------------------------------------------------|------|---|---|
| Hodgkin's disease                                   | C81                                                                       | 0-74 | • |   |
| Leukaemia                                           | C91, C92.0                                                                | 0-44 | • |   |
| Benign neoplasms                                    | D10-D36                                                                   | 0-74 | • |   |
| <b>Nutritional, endocrine and metabolic</b>         |                                                                           |      |   |   |
| Diabetes mellitus                                   | E10-E14                                                                   | 0-49 | • | • |
| <b>Drug use disorders</b>                           |                                                                           |      |   |   |
| Alcohol related diseases, excluding external causes | F10, G31.2, G62.1, I42.6, K29.2, K70, K73, K74 (excl. K74.3-K74.5), K86.0 | 0-74 |   | • |
| Illicit drug use disorders                          | F11-F16, F18-F19                                                          | 0-74 |   | • |
| <b>Neurological disorders</b>                       |                                                                           |      |   |   |
| Epilepsy and status epilepticus                     | G40-G41                                                                   | 0-74 | • |   |
| <b>Cardiovascular diseases</b>                      |                                                                           |      |   |   |
| Rheumatic and other valvular heart disease          | I01-I09                                                                   | 0-74 | • |   |
| Hypertensive diseases                               | I10-I15                                                                   | 0-74 | • |   |
| Ischaemic heart disease                             | I20-I25                                                                   | 0-74 | • | • |
| DVT with pulmonary embolism                         | I26, I80.1-I80.3, I80.9, I82.9                                            | 0-74 |   | • |
| Cerebrovascular diseases                            | I60-I69                                                                   | 0-74 | • |   |
| Aortic aneurysm and dissection                      | I71                                                                       | 0-74 |   | • |
| <b>Respiratory diseases</b>                         |                                                                           |      |   |   |
| Influenza (including swine flu)                     | J09-J11                                                                   | 0-74 | • | • |
| Pneumonia                                           | J12-J18                                                                   | 0-74 | • |   |
| Chronic obstructive pulmonary disorder              | J40-J44                                                                   | 0-74 |   | • |
| Asthma                                              | J45-J46                                                                   | 0-74 | • |   |
| <b>Digestive disorders</b>                          |                                                                           |      |   |   |
| Gastric and duodenal ulcer                          | K25-K28                                                                   | 0-74 | • |   |

|                                                                                                    |                                                    |      |     |
|----------------------------------------------------------------------------------------------------|----------------------------------------------------|------|-----|
| Acute abdomen, appendicitis, intestinal obstruction, cholecystitis/lithiasis, pancreatitis, hernia | K35-K38, K40-K46, K80-K83, K85, K86.1-K86.9, K91.5 | 0-74 | •   |
| <b>Genitourinary disorders</b>                                                                     |                                                    |      |     |
| Nephritis and nephrosis                                                                            | N00-N07, N17-N19, N25-N27                          | 0-74 | •   |
| Obstructive uropathy and prostatic hyperplasia                                                     | N13, N20-N21, N35, N40, N99.1                      | 0-74 | •   |
| <b>Maternal and infant</b>                                                                         |                                                    |      |     |
| Complications of perinatal period                                                                  | P00-P96, A33                                       | All  | •   |
| Congenital malformations, deformations and chromosomal anomalies                                   | Q00-Q99                                            | 0-74 | •   |
| <b>Unintentional injuries</b>                                                                      |                                                    |      |     |
| Transport Accidents                                                                                | V01-V99                                            | All  | •   |
| Accidental Injury                                                                                  | W00-X59                                            | All  | •   |
| <b>Intentional injuries</b>                                                                        |                                                    |      |     |
| Suicide and self inflicted injuries                                                                | X60-X84, Y10-Y34                                   | All  | •   |
| Homicide/Assault                                                                                   | X85-Y09, U50.9                                     | All  | •   |
| Misadventures to patients during surgical and medical care                                         | Y60-Y69, Y83-Y84                                   | All  | • • |

**Box 1: Categorisation of ischaemic heart disease within mortality and hospitalisation-based outcomes**

Ischaemic heart disease (ICD code I 20-I 25): an example of a condition that is considered amenable and preventable mortality at ages 0-74 years, and hence a contributor to avoidable mortality and avoidable hospitalisation/rehospitalisation. Within the UK, these definitions are used for monitoring and evaluating health policy and therefore have considerable policy relevance.

The major causes of ischaemic heart disease are well known and are changeable through personal, community level and societal interventions. At least 70% of this disease is thought to be theoretically preventable through actions such as stopping smoking, reducing LDL cholesterol levels through dietary and other changes, reduction of blood pressure through actions including reducing salt intake, and increasing physical activity.

Currently heart disease is also amenable to health care interventions e.g. successful treatment of cardiac arrest, thrombolysis of blood clots, and long-term action such as cardiac rehabilitation, and taking of drugs including statins. The actions for prevention will also be helpful for reducing the risk of a second ischaemic event.

Together, these kinds of interventions mean that ischaemic heart disease is largely avoidable. This condition exemplifies that the figures for avoidable mortality include both interventions that overlap in regards to preventability and amenability.

Given its preventability, and the opportunity to prevent new events, some specific conditions within the category ischaemic heart disease (ICD 10 codes I 24.8, I 24.9, and I 25) contribute to avoidable hospitalisation. Rehospitalisation within 30 days of discharge with a diagnosis of ischaemic heart disease would likely indicate suboptimal management of the original reason for hospitalisation.

**Table 2: Hospitalisation codes considered to be avoidable (NHS Outcomes Framework)**

| <b>ICD10 codes</b> | <b>Condition</b>                                                     | <b>Acute</b> | <b>Chronic</b> |
|--------------------|----------------------------------------------------------------------|--------------|----------------|
| A02.0              | Salmonella enteritis                                                 | X            |                |
| A04                | Other bacterial intestinal infections                                | X            |                |
| A05.9              | Bacterial foodborne intoxication, unspecified                        | X            |                |
| A07.2              | Cryptosporidiosis                                                    | X            |                |
| A08                | Viral and other specified intestinal infections                      | X            |                |
| A09                | Diarrhoea and gastroenteritis of presumed infectious origin          | X            |                |
| A36                | Diphtheria                                                           | X            |                |
| A37                | Whooping cough                                                       | X            |                |
| A69.0              | Necrotizing ulcerative stomatitis                                    | X            |                |
| B05                | Measles                                                              | X            |                |
| B06                | Rubella                                                              | X            |                |
| B16.1              | Acute hepatitis B with delta-agent without hepatic coma              | X            |                |
| B16.9              | Acute hepatitis B without delta-agent and without hepatic coma       | X            |                |
| B18.0              | Chronic viral hepatitis B with delta-agent                           |              | X              |
| B18.1              | Chronic viral hepatitis B without delta-agent                        |              | X              |
| B26                | Mumps                                                                | X            |                |
| D50.1              | Sideropenic dysphagia                                                |              | X              |
| D50.8              | Other iron deficiency anemias                                        |              | X              |
| D50.9              | Iron deficiency anemia, unspecified                                  |              | X              |
| D51                | Vitamin B12 deficiency anaemia                                       |              | X              |
| D52                | Folate deficiency anaemia                                            |              | X              |
| E10                | Type 1 diabetes mellitus                                             |              | X              |
| E11                | Type 2 diabetes mellitus                                             |              | X              |
| E12                | Malnutrition-related diabetes mellitus                               |              | X              |
| E13                | Other specified diabetes mellitus                                    |              | X              |
| E14                | Unspecified diabetes mellitus                                        |              | X              |
| E86                | Volume depletion                                                     | X            |                |
| F00                | Dementia in alzheimers                                               |              | X              |
| F01                | Vascular dementia                                                    |              | X              |
| F02                | Dementia in other diseases                                           |              | X              |
| F03                | Unspecified dementia                                                 |              | X              |
| G25.3              | Myoclonus                                                            | X            |                |
| G40                | Epilepsy and recurrent seizures                                      |              | X              |
| G41                | Status epilepticus                                                   |              | X              |
| H66                | Suppurative and unspecified otitis media                             | X            |                |
| H67                | Otitis media in diseases classified elsewhere                        | X            |                |
| I10X               | Essential (primary) hypertension                                     |              | X              |
| I11.0              | Hypertensive heart disease with heart failure                        |              | X              |
| I11.9              | Hypertensive heart disease without heart failure                     |              | X              |
| I13.0              | Hypertensive heart and renal disease with (congestive) heart failure |              | X              |
| I20                | Angina pectoris                                                      |              | X              |
| I24.0              | Coronary thrombosis not resulting in myocardial infarction           | X            |                |
| I24.8              | Other forms of acute ischaemic heart disease                         | X            |                |
| I24.9              | Acute ischaemic heart disease, unspecified                           | X            |                |
| I25                | Chronic ischaemic heart disease                                      |              | X              |
| I48X               | Atrial fibrillation and flutter                                      |              | X              |

|       |                                                                           |   |   |
|-------|---------------------------------------------------------------------------|---|---|
| I50   | Heart failure                                                             |   | X |
| I89.1 | Lymphangitis                                                              | X |   |
| J02   | Acute pharyngitis                                                         | X |   |
| J03   | Acute tonsillitis                                                         | X |   |
| J04.0 | Acute laryngitis                                                          | X |   |
| J06   | Acute upper respiratory infections multiple and unsp sites                | X |   |
| J10   | Influenza due to other identified influenza virus                         | X |   |
| J11   | Influenza due to unidentified influenza virus                             | X |   |
| J13X  | Pneumonia due to Streptococcus pneumoniae                                 | X |   |
| J14   | Pneumonia due to Hemophilus influenzae                                    | X |   |
| J15.3 | Pneumonia due to streptococcus, group B                                   | X |   |
| J15.4 | Pneumonia due to other streptococci                                       | X |   |
| J15.7 | Pneumonia due to Mycoplasma pneumoniae                                    | X |   |
| J15.9 | Unspecified bacterial pneumonia                                           | X |   |
| J16.8 | Pneumonia due to other specified infectious organisms                     | X |   |
| J18.1 | Lobar pneumonia, unspecified organism                                     | X |   |
| J18.8 | Other pneumonia, unspecified organism                                     | X |   |
| J20   | Acute bronchitis                                                          |   | X |
| J31.2 | Chronic pharyngitis                                                       | X |   |
| J41   | Simple and mucopurulent chronic bronchitis                                |   | X |
| J42X  | Unspecified chronic bronchitis                                            |   | X |
| J43   | Emphysema                                                                 |   | X |
| J44   | Other chronic obstructive pulmonary disease                               |   | X |
| J45   | Asthma                                                                    |   | X |
| J46X  | Status asthmaticus                                                        |   | X |
| J47X  | Bronchiectasis                                                            |   | X |
| J81X  | Pulmonary edema                                                           |   | X |
| K02   | Dental caries                                                             | X |   |
| K03   | Other diseases of hard tissues of teeth                                   | X |   |
| K04   | Diseases of pulp and periapical tissues                                   | X |   |
| K05   | Gingivitis and periodontal diseases                                       | X |   |
| K06   | Other disorders of gingiva and edentulous alveolar ridge                  | X |   |
| K08   | Other disorders of teeth and supporting structures                        | X |   |
| K09.8 | Other cysts of oral region, not elsewhere classified                      | X |   |
| K09.9 | Cyst of oral region, unspecified                                          | X |   |
| K12   | Stomatitis and related lesions                                            | X |   |
| K13   | Other diseases of lip and oral mucosa                                     | X |   |
| K20   | Esophagitis                                                               | X |   |
| K21   | Gastro-oesophageal reflux disease                                         | X |   |
| K25.0 | Acute gastric ulcer with hemorrhage                                       | X |   |
| K25.1 | Acute gastric ulcer with perforation                                      | X |   |
| K25.2 | Acute gastric ulcer with both hemorrhage and perforation                  | X |   |
| K25.4 | Chronic or unspecified gastric ulcer with hemorrhage                      | X |   |
| K25.5 | Chronic or unspecified gastric ulcer with perforation                     | X |   |
| K25.6 | Chronic or unspecified gastric ulcer with both hemorrhage and perforation | X |   |
| K26.0 | Acute duodenal ulcer with hemorrhage                                      | X |   |
| K26.1 | Acute duodenal ulcer with perforation                                     | X |   |
| K26.2 | Acute duodenal ulcer with both hemorrhage and perforation                 | X |   |
| K26.4 | Chronic or unspecified duodenal ulcer with hemorrhage                     | X |   |
| K26.5 | Chronic or unspecified duodenal ulcer with perforation                    | X |   |
| K26.6 | Chronic or unspecified duodenal ulcer with both                           | X |   |



|       |                                                                                             |   |  |
|-------|---------------------------------------------------------------------------------------------|---|--|
|       | hemorrhage and perforation                                                                  |   |  |
| K27.0 | Acute peptic ulcer, site unspecified, with hemorrhage                                       | X |  |
| K27.1 | Acute peptic ulcer, site unspecified, with perforation                                      | X |  |
| K27.2 | Acute peptic ulcer, site unspecified, with both hemorrhage and perforation                  | X |  |
| K27.4 | Chronic or unspecified peptic ulcer, site unspecified, with hemorrhage                      | X |  |
| K27.5 | Chronic or unspecified peptic ulcer, site unspecified, with perforation                     | X |  |
| K27.6 | Chronic or unspecified peptic ulcer, site unspecified, with both hemorrhage and perforation | X |  |
| K28.0 | Acute gastrojejunal ulcer with hemorrhage                                                   | X |  |
| K28.1 | Acute gastrojejunal ulcer with perforation                                                  | X |  |
| K28.2 | Acute gastrojejunal ulcer with both hemorrhage and perforation                              | X |  |
| K28.4 | Chronic or unspecified gastrojejunal ulcer with hemorrhage                                  | X |  |
| K28.5 | Chronic or unspecified gastrojejunal ulcer with perforation                                 | X |  |
| K28.6 | Chronic or unspecified gastrojejunal ulcer with both hemorrhage and perforation             | X |  |
| K52   | Other noninfective gastroenteritis and colitis                                              | X |  |
| L01   | Impetigo                                                                                    | X |  |
| L02   | Cutaneous abscess, furuncle and carbuncle                                                   | X |  |
| L03   | Cellulitis                                                                                  | X |  |
| L04   | Acute lymphadenitis                                                                         | X |  |
| L08.0 | Pyoderma                                                                                    | X |  |
| L08.8 | Other specified local infections of skin and subcutaneous tissue                            | X |  |
| L08.9 | Local infection of skin and subcutaneous tissue, unspecified                                | X |  |
| L88   | Pyoderma gangrenosum                                                                        | X |  |
| L98.0 | Pyogenic granuloma                                                                          | X |  |
| M01.4 | Rubella arthritis                                                                           | X |  |
| N10   | Acute tubulo-interstitial nephritis                                                         | X |  |
| N11   | Chronic tubulo-interstitial nephritis                                                       | X |  |
| N12   | Tubulo-interstitial nephritis not specified as acute or chronic                             | X |  |
| N13.6 | Pyonephrosis                                                                                | X |  |
| N15.9 | Renal tubulo-interstitial disease, unspecified                                              | X |  |
| N30.0 | Acute cystitis                                                                              | X |  |
| N30.8 | Other cystitis                                                                              | X |  |
| N30.9 | Cystitis, unspecified                                                                       | X |  |
| N39.0 | Urinary tract infection, site not specified                                                 | X |  |
| O15   | Eclampsia                                                                                   | X |  |
| R56   | Convulsions, not elsewhere classified                                                       | X |  |

**Table 3: Socio-demographic characteristics of the linked Census population by sex**

| Sex and ethnic group | N       | Age at Census in years |      | Country of Birth | SIMD        |                   | Highest Qualification (individual) |      |      | Highest Qualification (household) |      |      | Household Tenure |        |
|----------------------|---------|------------------------|------|------------------|-------------|-------------------|------------------------------------|------|------|-----------------------------------|------|------|------------------|--------|
|                      |         | (mean, SD)             |      |                  | UK born (%) | Most Deprived (%) | Least Deprived (%)                 | No   | Low  | High                              | No   | Low  | High             | Rented |
| <b>Males</b>         |         |                        |      |                  |             |                   |                                    |      |      |                                   |      |      |                  |        |
| White Scottish       | 1949484 | 38                     | (22) | 99.1             | 20.1        | 19.8              | 34.2                               | 41.4 | 24.4 | 20.2                              | 40.8 | 39.0 | 31.4             | 68.6   |
| Other White British  | 160235  | 42                     | (20) | 95.3             | 8.0         | 29.6              | 17.2                               | 34.5 | 48.4 | 10.0                              | 28.1 | 61.9 | 27.7             | 72.3   |
| White Irish          | 20341   | 45                     | (20) | 98.4             | 22.2        | 21.7              | 32.7                               | 30.5 | 36.8 | 19.8                              | 28.8 | 51.4 | 34.6             | 65.4   |
| Other White          | 29944   | 36                     | (21) | 30.5             | 12.4        | 32.6              | 24.4                               | 26.5 | 49.2 | 11.5                              | 22.3 | 66.2 | 43.4             | 56.6   |
| Any Mixed Background | 5310    | 21                     | (18) | 76.0             | 19.7        | 26.1              | 21.1                               | 42.1 | 36.8 | 12.0                              | 28.3 | 59.7 | 42.9             | 57.1   |
| Indian               | 6448    | 31                     | (19) | 48.4             | 9.7         | 38.5              | 21.5                               | 27.6 | 50.9 | 10.0                              | 25.5 | 64.5 | 27.8             | 72.2   |
| Pakistani            | 12929   | 27                     | (19) | 58.0             | 15.8        | 24.8              | 39.7                               | 33.9 | 26.5 | 17.3                              | 35.2 | 47.5 | 23.8             | 76.2   |
| Other South Asian    | 3549    | 29                     | (19) | 38.9             | 24.2        | 28.3              | 25.3                               | 28.3 | 46.4 | 15.9                              | 25.4 | 58.7 | 46.3             | 53.7   |
| African origin       | 3277    | 30                     | (18) | 39.9             | 27.6        | 22.4              | 17.3                               | 30.3 | 52.4 | 9.9                               | 21.9 | 68.2 | 56.9             | 43.1   |
| Chinese              | 6532    | 30                     | (18) | 38.4             | 13.4        | 38.5              | 39.0                               | 29.2 | 31.8 | 21.2                              | 30.5 | 48.3 | 30.2             | 69.8   |
| <b>Females</b>       |         |                        |      |                  |             |                   |                                    |      |      |                                   |      |      |                  |        |
| White Scottish       | 2138643 | 41                     | (24) | 99.1             | 21.3        | 19.2              | 35.7                               | 40.6 | 23.8 | 21.9                              | 40.3 | 37.8 | 34.8             | 65.2   |
| Other White British  | 174748  | 44                     | (21) | 95.0             | 8.2         | 28.9              | 19.8                               | 39.4 | 40.8 | 11.5                              | 30.0 | 58.5 | 30.5             | 69.5   |
| White Irish          | 23162   | 49                     | (21) | 98.6             | 20.1        | 22.8              | 32.9                               | 29.1 | 38.0 | 20.8                              | 25.8 | 53.4 | 35.9             | 64.1   |
| Other White          | 35711   | 37                     | (21) | 26.4             | 10.8        | 33.4              | 21.5                               | 27.2 | 51.3 | 10.7                              | 20.7 | 68.7 | 41.3             | 58.7   |
| Any Mixed Background | 5799    | 24                     | (20) | 74.5             | 18.7        | 27.3              | 19.9                               | 42.3 | 37.8 | 11.5                              | 28.3 | 60.2 | 44.2             | 55.8   |
| Indian               | 5888    | 30                     | (19) | 51.1             | 9.6         | 39.0              | 27.0                               | 32.3 | 40.7 | 10.8                              | 27.3 | 61.9 | 26.4             | 73.6   |
| Pakistani            | 12702   | 26                     | (18) | 60.5             | 15.4        | 24.6              | 44.3                               | 32.9 | 22.8 | 17.1                              | 35.8 | 47.1 | 24.1             | 75.9   |
| Other South Asian    | 2963    | 29                     | (20) | 44.5             | 22.0        | 28.9              | 29.5                               | 33.7 | 36.7 | 18.0                              | 26.9 | 55.2 | 45.5             | 54.5   |
| African origin       | 3056    | 30                     | (18) | 42.1             | 27.5        | 24.5              | 17.8                               | 36.1 | 46.1 | 10.2                              | 22.2 | 67.6 | 54.9             | 45.1   |
| Chinese              | 6672    | 31                     | (18) | 33.9             | 12.1        | 39.1              | 37.6                               | 29.0 | 33.3 | 20.1                              | 29.5 | 50.3 | 29.9             | 70.1   |

**Table 4: Age adjusted rates per 100,000 population (PY) and rate ratios (RR x100) for amenable mortality by sex and ethnic group. RRs are age, socio-economic status (SES) (household tenure, combined individual and household education and Scottish Index of Multiple Deprivation SIMD) and UK/ROI-born (versus born elsewhere) adjusted, with 95% confidence intervals.**

| <b>Ethnic group</b>  | <b>Any amenable death</b> | <b>PY at risk</b> | <b>Age-adjusted poisson rates (for 100,000 PY)</b> | <b>Age adjusted RR and 95% CI</b> | <b>Age and SES adjusted RR and 95% CI</b> | <b>Age and UK/ROI-born adjusted RR and 95% CI</b> | <b>Age, UK/ROI-born and SES adjusted RR and 95% CI</b> |
|----------------------|---------------------------|-------------------|----------------------------------------------------|-----------------------------------|-------------------------------------------|---------------------------------------------------|--------------------------------------------------------|
| <b>MALES</b>         |                           |                   |                                                    |                                   |                                           |                                                   |                                                        |
| White Scottish       | 44390                     | 21179755          | 209.6                                              | 100.0                             | 100.0                                     | 100.0                                             | 100.0                                                  |
| Other White British  | 2570                      | 1571080           | 133.3                                              | 63.6 (53.9, 75.1)                 | 80.3 (76.4, 84.4)                         | 64 (54.2, 75.6)                                   | 80.6 (76.7, 84.7)                                      |
| White Irish          | 550                       | 202190            | 205.1                                              | 97.9 (79.1, 121.1)                | 92.7 (85.1, 101)                          | 97.9 (79.1, 121.2)                                | 92.7 (85.1, 101)                                       |
| Other White          | 335                       | 278515            | 146.6                                              | 69.9 (58.5, 83.6)                 | 79.3 (71.5, 87.9)                         | 83 (70, 98.4)                                     | 85.9 (76.1, 96.9)                                      |
| Any Mixed Background | 40                        | 56265             | 211.7                                              | 101 (71.5, 142.7)                 | 97.1 (70.4, 133.9)                        | 109.5 (78.3, 153.2)                               | 100.2 (72.5, 138.5)                                    |
| Indian               | 75                        | 65945             | 159                                                | 75.9 (57.1, 100.8)                | 100.8 (80.2, 126.8)                       | 94.7 (71.7, 125.2)                                | 111.4 (87.6, 141.7)                                    |
| Pakistani            | 155                       | 146430            | 195.1                                              | 93.1 (75.7, 114.4)                | 99.5 (84.4, 117.4)                        | 116.6 (94.9, 143.3)                               | 110.5 (91.9, 132.9)                                    |
| Other South Asian    | 40                        | 35500             | 183.8                                              | 87.7 (63.1, 121.8)                | 92.5 (67.3, 127.3)                        | 107.6 (77.6, 149.3)                               | 101.1 (72.9, 140.1)                                    |
| African Origin       | 30                        | 32160             | 170.2                                              | 81.2 (55.2, 119.4)                | 78.4 (54.1, 113.5)                        | 97 (66.2, 142.1)                                  | 84.8 (58.3, 123.2)                                     |
| Chinese              | 35                        | 68685             | 82.4                                               | 39.3 (26.8, 57.7)                 | 41.7 (29.9, 58.2)                         | 49.6 (33.8, 72.8)                                 | 46.4 (32.9, 65.5)                                      |

| Ethnic group         | Any Amenable Death | PY at risk | Age-adjusted rates (for 100,000 PY) | Age adjusted RR and 95% CI | Age and SES adjusted RR and 95% CI | Age and UK/ROI-born adjusted RR and 95% CI | Age, UK/ROI-born and SES adjusted RR and 95% CI |
|----------------------|--------------------|------------|-------------------------------------|----------------------------|------------------------------------|--------------------------------------------|-------------------------------------------------|
| FEMALES              |                    |            |                                     |                            |                                    |                                            |                                                 |
| White Scottish       | 33620              | 22581190   | 148.9                               | 100.0                      | 100.0                              | 100.0                                      | 100.0                                           |
| Other White British  | 1945               | 1644435    | 103.3                               | 69.4 (59.9, 80.3)          | 84.5 (80.6, 88.6)                  | 69.9 (60.4, 80.9)                          | 84.8 (80.9, 88.9)                               |
| White Irish          | 370                | 216905     | 123.5                               | 82.9 (69.7, 98.7)          | 82.9 (73.4, 93.7)                  | 82.9 (69.7, 98.7)                          | 82.9 (73.4, 93.7)                               |
| Other White          | 305                | 319915     | 108.2                               | 72.7 (61.5, 85.9)          | 86.1 (76.7, 96.6)                  | 86.4 (73.1, 102.1)                         | 94 (82, 107.7)                                  |
| Any Mixed Background | 30                 | 59970      | 129.4                               | 86.9 (61.2, 123.5)         | 83.7 (60.4, 116)                   | 93.8 (66.4, 132.4)                         | 86.6 (62.5, 120)                                |
| Indian               | 45                 | 59925      | 124.6                               | 83.7 (62.8, 111.5)         | 101.2 (79, 129.7)                  | 101.6 (75.9, 136)                          | 111.6 (85.8, 145.2)                             |
| Pakistani            | 85                 | 143940     | 130.1                               | 87.4 (68.5, 111.5)         | 90.7 (73.3, 112.3)                 | 106 (82.5, 136.2)                          | 100.3 (79.5, 126.6)                             |
| Other South Asian    | 20                 | 28610      | 117.1                               | 78.7 (51.4, 120.5)         | 79.7 (53.2, 119.4)                 | 92.4 (60.3, 141.6)                         | 86.2 (57.2, 130)                                |
| African Origin       | 25                 | 28590      | 155.7                               | 104.6 (69.9, 156.6)        | 108 (74.2, 157.1)                  | 120.3 (80.6, 179.6)                        | 115.7 (79.3, 168.7)                             |
| Chinese              | 40                 | 68010      | 90.9                                | 61.1 (44.2, 84.4)          | 65.8 (49.2, 87.9)                  | 75.6 (54.2, 105.5)                         | 73.4 (54, 99.8)                                 |

**Table 5: Age adjusted rates per 100,000 population (PY) and rate ratios (RR x100) for amenable mortality (excluding IHD) by sex and ethnic group. RRs are age, socio-economic status (SES) (household tenure, combined individual and household education and Scottish Index of Multiple Deprivation SIMD) and UK/ROI-born (versus born elsewhere) adjusted, with 95% confidence intervals.**

| <b>Ethnic group</b>  | <b>Any amenable death (ex IHD)</b> | <b>PY at risk</b> | <b>Age-adjusted poisson rates (for 100,000 PY)</b> | <b>Age adjusted RR and 95% CI</b> | <b>Age and SES adjusted RR and 95% CI</b> | <b>Age and UK/ROI-born adjusted RR and 95% CI</b> | <b>Age, UK/ROI-born and SES adjusted RR and 95% CI</b> |
|----------------------|------------------------------------|-------------------|----------------------------------------------------|-----------------------------------|-------------------------------------------|---------------------------------------------------|--------------------------------------------------------|
| <b>MALES</b>         |                                    |                   |                                                    |                                   |                                           |                                                   |                                                        |
| White Scottish       | 20760                              | 21179755          | 98                                                 | 100.0                             | 100.0                                     | 100.0                                             | 100.0                                                  |
| Other White British  | 1195                               | 1571080           | 62.6                                               | 63.9 (54.9, 74.4)                 | 78.7 (73.3, 84.5)                         | 64.4 (55.3, 75)                                   | 79.1 (73.7, 84.9)                                      |
| White Irish          | 255                                | 202190            | 95.6                                               | 97.5 (75.2, 126.6)                | 92.8 (80.5, 107)                          | 97.6 (75.2, 126.6)                                | 92.8 (80.5, 107)                                       |
| Other White          | 165                                | 278515            | 71.8                                               | 73.2 (60.3, 89)                   | 81.1 (70.1, 93.8)                         | 90 (73.7, 109.9)                                  | 92.8 (78.3, 110)                                       |
| Any Mixed Background | 15                                 | 56265             | 71.9                                               | 73.4 (44.6, 120.7)                | 70.4 (43.1, 115)                          | 80.5 (49.2, 132)                                  | 74.3 (45.4, 121.6)                                     |
| Indian               | 30                                 | 65945             | 58.8                                               | 60 (39.2, 91.9)                   | 76.4 (52.5, 111.1)                        | 77.9 (50.8, 119.4)                                | 90.1 (61.1, 133)                                       |
| Pakistani            | 70                                 | 146430            | 83.7                                               | 85.4 (64.5, 113)                  | 90.5 (69.4, 118.1)                        | 110.7 (82.8, 148.1)                               | 107.4 (80.4, 143.4)                                    |
| Other South Asian    | 15                                 | 35500             | 62.7                                               | 63.9 (38, 107.6)                  | 65.9 (39.2, 110.8)                        | 81.4 (48.2, 137.7)                                | 76.5 (45.1, 129.7)                                     |
| African Origin       | 20                                 | 32160             | 103.8                                              | 105.9 (67.4, 166.4)               | 100.8 (64.5, 157.4)                       | 130.7 (83.1, 205.6)                               | 115 (73.2, 180.6)                                      |
| Chinese              | 30                                 | 68685             | 60.9                                               | 62.1 (41.8, 92.2)                 | 64.9 (45.3, 93.1)                         | 81.7 (54.6, 122.3)                                | 77.5 (53.1, 113.3)                                     |

| Ethnic group         | Any Amenable Death (ex IHD) | PY at risk | Age-adjusted rates (for 100,000 PY) | Age adjusted RR and 95% CI | Age and SES adjusted RR and 95% CI | Age and UK/ROI-born adjusted RR and 95% CI | Age, UK/ROI-born and SES adjusted RR and 95% CI |
|----------------------|-----------------------------|------------|-------------------------------------|----------------------------|------------------------------------|--------------------------------------------|-------------------------------------------------|
| FEMALES              |                             |            |                                     |                            |                                    |                                            |                                                 |
| White Scottish       | 23125                       | 22581190   | 102.4                               | 100                        | 100                                | 100                                        | 100                                             |
| Other White British  | 1460                        | 1644435    | 77.1                                | 75.3 (67.1, 84.4)          | 87.2 (82.8, 91.8)                  | 75.8 (67.5, 85)                            | 87.5 (83.1, 92.2)                               |
| White Irish          | 260                         | 216905     | 87.8                                | 85.7 (73.5, 100)           | 86.2 (74.8, 99.4)                  | 85.7 (73.5, 100)                           | 86.2 (74.8, 99.4)                               |
| Other White          | 225                         | 319915     | 78.9                                | 77.1 (65.8, 90.3)          | 87.2 (76.6, 99.4)                  | 90.2 (75.9, 107.2)                         | 96.2 (82, 112.8)                                |
| Any Mixed Background | 25                          | 59970      | 94.7                                | 92.5 (61.3, 139.4)         | 90 (61.2, 132.5)                   | 99.1 (65.9, 149)                           | 93.6 (63.6, 137.7)                              |
| Indian               | 30                          | 59925      | 80.7                                | 78.8 (56.6, 109.8)         | 90.8 (66.1, 124.7)                 | 93.7 (66.5, 131.9)                         | 101 (72.4, 141.1)                               |
| Pakistani            | 55                          | 143940     | 80.6                                | 78.7 (59.9, 103.5)         | 80.8 (62.9, 103.7)                 | 93.4 (70.2, 124.4)                         | 90 (68.4, 118.3)                                |
| Other South Asian    | 10                          | 28610      | 67.4                                | 65.9 (37.4, 115.9)         | 66.3 (38.4, 114.5)                 | 76.4 (43.2, 135)                           | 72.5 (41.6, 126.2)                              |
| African Origin       | 20                          | 28590      | 123.9                               | 121 (79.8, 183.4)          | 123.2 (82.9, 183.3)                | 137.7 (90.8, 208.7)                        | 133.3 (89.3, 198.8)                             |
| Chinese              | 35                          | 68010      | 74.6                                | 72.9 (51.8, 102.6)         | 77 (55.5, 106.8)                   | 88.5 (61.9, 126.5)                         | 86.9 (61.3, 123.2)                              |

**Table 6: Age adjusted rates per 100,000 population (PY) and rate ratios (RR x100) for preventable mortality, for the population by sex and ethnic. RRs are age, socio-economic status (SES) (household tenure, combined individual and household education and Scottish Index of Multiple Deprivation SIMD) and UK/ROI-born (versus born elsewhere) adjusted, with 95% confidence intervals.**

| <b>Ethnic group</b>  | <b>Any preventable death</b> | <b>PY at risk</b> | <b>Age-adjusted poisson rates (for 100,000 PY)</b> | <b>Age adjusted RR and 95% CI</b> | <b>Age and SES adjusted RR and 95% CI</b> | <b>Age and UK/ROI-born adjusted RR and 95% CI</b> | <b>Age, UK/ROI-born and SES adjusted RR and 95% CI</b> |
|----------------------|------------------------------|-------------------|----------------------------------------------------|-----------------------------------|-------------------------------------------|---------------------------------------------------|--------------------------------------------------------|
| <b>MALES</b>         |                              |                   |                                                    |                                   |                                           |                                                   |                                                        |
| White Scottish       | 76165                        | 21179755          | 359.6                                              | 100.0                             | 100.0                                     | 100.0                                             | 100.0                                                  |
| Other White British  | 4275                         | 1571080           | 224.1                                              | 62.3 (52.4, 74.1)                 | 81 (77.6, 84.5)                           | 62.8 (52.8, 74.7)                                 | 81.2 (77.8, 84.8)                                      |
| White Irish          | 910                          | 202190            | 345.3                                              | 96 (78.7, 117.1)                  | 91.2 (82.9, 100.4)                        | 96.1 (78.8, 117.2)                                | 91.3 (82.9, 100.4)                                     |
| Other White          | 575                          | 278515            | 241.3                                              | 67.1 (56.9, 79.1)                 | 77.1 (70.6, 84.2)                         | 80.9 (69.5, 94.2)                                 | 84.8 (77, 93.4)                                        |
| Any Mixed Background | 85                           | 56265             | 380.6                                              | 105.8 (81.5, 137.4)               | 102.5 (82.3, 127.7)                       | 115 (89.5, 147.9)                                 | 106.3 (85.2, 132.7)                                    |
| Indian               | 115                          | 65945             | 228.6                                              | 63.6 (49.2, 82.2)                 | 86.9 (71.1, 106.1)                        | 79.7 (62.3, 102)                                  | 97 (78.9, 119.4)                                       |
| Pakistani            | 170                          | 146430            | 196                                                | 54.5 (45.2, 65.8)                 | 58.9 (51.2, 67.8)                         | 68.1 (56.7, 81.7)                                 | 66 (56.7, 76.9)                                        |
| Other South Asian    | 70                           | 35500             | 298.9                                              | 83.1 (61.7, 112)                  | 87.8 (67.8, 113.7)                        | 103.1 (77.2, 137.7)                               | 97.3 (74.7, 126.6)                                     |
| African Origin       | 50                           | 32160             | 259.8                                              | 72.3 (51.4, 101.6)                | 69.4 (50.8, 94.8)                         | 87.2 (62.4, 121.9)                                | 76 (55.4, 104.1)                                       |
| Chinese              | 75                           | 68685             | 152.1                                              | 42.3 (32.7, 54.7)                 | 45.9 (36.8, 57.1)                         | 53.8 (41.8, 69.2)                                 | 51.8 (41.3, 65)                                        |

| <b>Ethnic group</b>  | <b>Any Preventable Death</b> | <b>PY at risk</b> | <b>Age-adjusted rates (for 100,000 PY)</b> | <b>Age adjusted RR and 95% CI</b> | <b>Age and ses adjusted RR and 95% CI</b> | <b>Age and UK/ROI-born adjusted RR and 95% CI</b> | <b>Age, UK/ROI-born and ses adjusted RR and 95% CI</b> |
|----------------------|------------------------------|-------------------|--------------------------------------------|-----------------------------------|-------------------------------------------|---------------------------------------------------|--------------------------------------------------------|
| <b>FEMALES</b>       |                              |                   |                                            |                                   |                                           |                                                   |                                                        |
| White Scottish       | 51505                        | 22581190          | 228.1                                      | 100.0                             | 100.0                                     | 100.0                                             | 100.0                                                  |
| Other White British  | 2790                         | 1644435           | 147.3                                      | 64.6 (54.7, 76.2)                 | 81.6 (78.2, 85.2)                         | 65.2 (55.3, 77)                                   | 82.1 (78.7, 85.7)                                      |
| White Irish          | 565                          | 216905            | 188                                        | 82.4 (68.4, 99.2)                 | 82.3 (74.6, 90.7)                         | 82.4 (68.4, 99.2)                                 | 82.3 (74.6, 90.8)                                      |
| Other White          | 415                          | 319915            | 147                                        | 64.5 (53.9, 77.1)                 | 78.8 (70.6, 87.9)                         | 82 (69.1, 97.4)                                   | 90.9 (80.3, 103)                                       |
| Any Mixed Background | 45                           | 59970             | 182.9                                      | 80.2 (57.5, 111.8)                | 77.4 (58.2, 103)                          | 88.9 (64.4, 122.7)                                | 81.6 (61.3, 108.5)                                     |
| Indian               | 50                           | 59925             | 132.1                                      | 57.9 (43.3, 77.5)                 | 73 (56.5, 94.3)                           | 75.6 (56.7, 100.9)                                | 85.5 (65.4, 111.7)                                     |
| Pakistani            | 100                          | 143940            | 147.1                                      | 64.5 (52.2, 79.8)                 | 68 (56.6, 81.6)                           | 84 (67.8, 104.1)                                  | 79.9 (65.4, 97.6)                                      |
| Other South Asian    | 25                           | 28610             | 171.4                                      | 75.2 (50.2, 112.5)                | 77 (51.9, 114.2)                          | 93.9 (63, 140.2)                                  | 87.3 (58.5, 130.3)                                     |
| African Origin       | 30                           | 28590             | 186.4                                      | 81.7 (55.8, 119.6)                | 84.9 (60.1, 119.9)                        | 99.4 (68.4, 144.2)                                | 95 (67.2, 134.4)                                       |
| Chinese              | 50                           | 68010             | 119.3                                      | 52.3 (39.5, 69.2)                 | 58.2 (46.1, 73.4)                         | 70.5 (53.1, 93.5)                                 | 69.6 (54.3, 89.2)                                      |



**Table 7: Age adjusted rates per 100,000 population (PY) and rate ratios (RR x100) for avoidable (amenable and preventable combined) mortality by sex and ethnic group. RRs are age, socio-economic status (SES) (household tenure, combined individual and household education and Scottish Index of Multiple Deprivation SIMD) and UK/ROI-born (versus born elsewhere) adjusted, with 95% confidence intervals.**

| <b>Ethnic group</b>  | <b>Any avoidable death</b> | <b>PY at risk</b> | <b>Age-adjusted rates (for 100,000 PY)</b> | <b>Age adjusted RR and 95% CI</b> | <b>Age and SES adjusted RR and 95% CI</b> | <b>Age and UK/ROI-born adjusted RR and 95% CI</b> | <b>Age, UK/ROI-born and SES adjusted RR and 95% CI</b> |
|----------------------|----------------------------|-------------------|--------------------------------------------|-----------------------------------|-------------------------------------------|---------------------------------------------------|--------------------------------------------------------|
| <b>MALES</b>         |                            |                   |                                            |                                   |                                           |                                                   |                                                        |
| White Scottish       | 90510                      | 21179755          | 427.3                                      | 100.0                             | 100.0                                     | 100.0                                             | 100.0                                                  |
| Other White British  | 5065                       | 1571080           | 265.6                                      | 62.1 (52.3, 73.9)                 | 80.6 (77.1, 84.2)                         | 62.6 (52.6, 74.5)                                 | 80.9 (77.4, 84.5)                                      |
| White Irish          | 1080                       | 202190            | 410.4                                      | 96 (78.1, 118.2)                  | 91.1 (84.8, 98)                           | 96.1 (78.1, 118.3)                                | 91.2 (84.8, 98)                                        |
| Other White          | 685                        | 278515            | 290                                        | 67.9 (57.7, 79.8)                 | 77.8 (71.8, 84.2)                         | 82.5 (71.1, 95.8)                                 | 86.4 (79.1, 94.3)                                      |
| Any Mixed Background | 100                        | 56265             | 438.4                                      | 102.6 (80.2, 131.2)               | 99.1 (80.2, 122.4)                        | 111.9 (88.5, 141.6)                               | 103.2 (83.4, 127.7)                                    |
| Indian               | 130                        | 65945             | 259.5                                      | 60.7 (46.9, 78.6)                 | 82.7 (68.2, 100.4)                        | 77.1 (60.3, 98.5)                                 | 93.6 (76.6, 114.3)                                     |
| Pakistani            | 215                        | 146430            | 252.3                                      | 59 (49.4, 70.5)                   | 63.8 (55.7, 73)                           | 74.7 (63, 88.4)                                   | 72.4 (62.7, 83.7)                                      |
| Other South Asian    | 80                         | 35500             | 348.9                                      | 81.7 (62.2, 107.2)                | 86 (68.1, 108.7)                          | 102.4 (78.9, 132.9)                               | 96.3 (75.8, 122.3)                                     |
| African Origin       | 65                         | 32160             | 340.7                                      | 79.7 (59.1, 107.6)                | 76.4 (58, 100.5)                          | 97.1 (72.5, 130.1)                                | 84.4 (64, 111.4)                                       |
| Chinese              | 90                         | 68685             | 188.9                                      | 44.2 (34.4, 56.8)                 | 47.7 (38.9, 58.6)                         | 56.9 (44.6, 72.7)                                 | 54.6 (44.2, 67.5)                                      |

| <b>Ethnic group</b>  | <b>Any avoidable death</b> | <b>PY at risk</b> | <b>Age-adjusted rates (for 100,000 PY)</b> | <b>Age adjusted RR and 95% CI</b> | <b>Age and SES adjusted RR and 95% CI</b> | <b>Age and UK/ROI-born adjusted RR and 95% CI</b> | <b>Age, UK/ROI-born and SES adjusted RR and 95% CI</b> |
|----------------------|----------------------------|-------------------|--------------------------------------------|-----------------------------------|-------------------------------------------|---------------------------------------------------|--------------------------------------------------------|
| <b>FEMALES</b>       |                            |                   |                                            |                                   |                                           |                                                   |                                                        |
| White Scottish       | 63200                      | 22581190          | 279.9                                      | 100.0                             | 100.0                                     | 100.0                                             | 100.0                                                  |
| Other White British  | 3415                       | 1644435           | 180.8                                      | 64.6 (54.7, 76.2)                 | 81.6 (78.4, 85)                           | 65.2 (55.3, 76.9)                                 | 82.1 (78.8, 85.5)                                      |
| White Irish          | 705                        | 216905            | 234.1                                      | 83.6 (69.8, 100.2)                | 83.5 (76, 91.8)                           | 83.6 (69.8, 100.2)                                | 83.5 (76, 91.8)                                        |
| Other White          | 520                        | 319915            | 183.7                                      | 65.7 (55.4, 77.8)                 | 80.3 (72.9, 88.4)                         | 82.3 (70, 96.7)                                   | 91.1 (81.6, 101.8)                                     |
| Any Mixed Background | 60                         | 59970             | 247.7                                      | 88.5 (65.5, 119.5)                | 85.3 (66.4, 109.5)                        | 97.4 (72.9, 130.2)                                | 89.4 (69.6, 114.7)                                     |
| Indian               | 60                         | 59925             | 161.6                                      | 57.7 (44, 75.7)                   | 72.6 (58.1, 90.8)                         | 74.1 (56.8, 96.7)                                 | 83.6 (66.2, 105.6)                                     |
| Pakistani            | 125                        | 143940            | 184.6                                      | 66 (53.8, 80.9)                   | 69.4 (58.6, 82.2)                         | 84.4 (68.9, 103.3)                                | 80.1 (66.6, 96.2)                                      |
| Other South Asian    | 30                         | 28610             | 204.2                                      | 73 (50.9, 104.7)                  | 74.6 (52.9, 105)                          | 89.8 (62.9, 128.3)                                | 83.4 (58.9, 118.1)                                     |
| African Origin       | 40                         | 28590             | 246.6                                      | 88.1 (62.8, 123.6)                | 91.5 (68.1, 123)                          | 105.7 (76.1, 146.9)                               | 101.1 (75.1, 136.1)                                    |
| Chinese              | 70                         | 68010             | 164.8                                      | 58.9 (45.1, 76.8)                 | 65.2 (53, 80.3)                           | 77.8 (59.6, 101.5)                                | 76.4 (61.2, 95.5)                                      |

**Table 8: Age adjusted rates per 100,000 person-years (PY) and rate ratios (RR x100) for avoidable hospitalisations by sex and ethnic group. RRs are age, socio-economic status (SES) (household tenure, combined individual and household education and Scottish Index of Multiple Deprivation SIMD) and UK/ROI-born (versus born elsewhere) adjusted, with 95% confidence intervals.**

| Ethnic group                  | Avoidable hospitalisations | PY at risk | Age-adjusted rates (for 100,000 PY) | Age adjusted RR and 95% CI | Age and SES adjusted RR and 95% CI | Age and UK/ROI-born adjusted RR and 95% CI | Age, UK/ROI-born and SES adjusted RR and 95% CI |
|-------------------------------|----------------------------|------------|-------------------------------------|----------------------------|------------------------------------|--------------------------------------------|-------------------------------------------------|
| MALES                         |                            |            |                                     |                            |                                    |                                            |                                                 |
| White Scottish                | 529565                     | 12005945   | 4410.9                              | 100                        | 100                                | 100                                        | 100                                             |
| Other White British           | 35285                      | 825250     | 4170.1                              | 81.4 (79.8, 83)            | 92.7 (90.9, 94.6)                  | 81.6 (80, 83.3)                            | 92.9 (91, 94.8)                                 |
| White Irish                   | 6630                       | 115335     | 5605                                | 102.5 (97.9, 107.2)        | 100.1 (95.7, 104.7)                | 102.5 (98, 107.2)                          | 100.1 (95.7, 104.7)                             |
| Other White                   | 4740                       | 125325     | 3687.3                              | 84.2 (80.2, 88.5)          | 90.8 (86.5, 95.3)                  | 91.3 (86.4, 96.6)                          | 94.6 (89.4, 100.1)                              |
| Any Mixed Background          | 615                        | 24860      | 2408.8                              | 108.2 (93, 126)            | 107.7 (92.6, 125.2)                | 111.9 (96, 130.3)                          | 109.4 (94, 127.3)                               |
| Indian                        | 1430                       | 32490      | 4296                                | 114.2 (102.7, 127)         | 133.7 (120.2, 148.6)               | 125.5 (112, 140.6)                         | 140.1 (125, 157)                                |
| Pakistani                     | 3275                       | 77290      | 4131.7                              | 140.6 (131.9, 150)         | 145.3 (136.2, 155)                 | 154.3 (143.8, 165.5)                       | 152.3 (141.8, 163.5)                            |
| Bangladeshi                   | 175                        | 4390       | 3867.9                              | 130.8 (107.1, 159.8)       | 136 (111.2, 166.3)                 | 143.5 (117.1, 175.8)                       | 142.3 (116, 174.5)                              |
| Other South Asian             | 365                        | 12485      | 2844.1                              | 85.9 (71.5, 103.2)         | 89.4 (74.5, 107.4)                 | 93.8 (77.8, 113.1)                         | 93.3 (77.5, 112.5)                              |
| Caribbean                     | 85                         | 3370       | 2461.4                              | 65.1 (49.9, 84.9)          | 67.3 (51.5, 87.9)                  | 69.8 (53.4, 91)                            | 69.6 (53.2, 91)                                 |
| African                       | 225                        | 8160       | 2677.6                              | 94.3 (62.4, 142.3)         | 95.7 (63.4, 144.5)                 | 103.9 (68.3, 158)                          | 100.5 (66, 152.9)                               |
| Black Scottish or Other Black | 75                         | 2585       | 2828.3                              | 98 (71, 135.5)             | 88.6 (63.7, 123.1)                 | 100.8 (72.9, 139.5)                        | 89.8 (64.5, 124.9)                              |
| Chinese                       | 680                        | 25395      | 2619.2                              | 70.8 (62.5, 80.1)          | 72.3 (63.9, 81.9)                  | 78.3 (68.8, 89.2)                          | 76.1 (66.8, 86.7)                               |

| <b>Ethnic group</b>           | <b>Avoidable hospitalisations</b> | <b>PY at risk</b> | <b>Age-adjusted rates (for 100,000 PY)</b> | <b>Age adjusted RR and 95% CI</b> | <b>Age and SES adjusted RR and 95% CI</b> | <b>Age and UK/ROI-born adjusted RR and 95% CI</b> | <b>Age, UK/ROI-born and SES adjusted RR and 95% CI</b> |
|-------------------------------|-----------------------------------|-------------------|--------------------------------------------|-----------------------------------|-------------------------------------------|---------------------------------------------------|--------------------------------------------------------|
| <b>FEMALES</b>                |                                   |                   |                                            |                                   |                                           |                                                   |                                                        |
| White Scottish                | 538190                            | 13669790          | 3937.1                                     | 100                               | 100                                       | 100                                               | 100                                                    |
| Other White British           | 32005                             | 929145            | 3359.6                                     | 78.7 (77, 80.4)                   | 91.7 (89.7, 93.7)                         | 79 (77.3, 80.7)                                   | 91.7 (89.8, 93.8)                                      |
| White Irish                   | 6580                              | 131325            | 4885.4                                     | 97.3 (92.8, 102.1)                | 97.9 (93.4, 102.7)                        | 97.3 (92.8, 102)                                  | 97.9 (93.4, 102.7)                                     |
| Other White                   | 4855                              | 156675            | 3021.7                                     | 76.8 (72.2, 81.7)                 | 87.2 (82, 92.8)                           | 82.5 (76.9, 88.4)                                 | 89.1 (83.1, 95.6)                                      |
| Any Mixed Background          | 725                               | 29455             | 2397.3                                     | 98.4 (86.3, 112.2)                | 97.4 (85.4, 111)                          | 100.9 (88.4, 115.2)                               | 98 (86, 111.8)                                         |
| Indian                        | 1070                              | 31205             | 3347.4                                     | 107.2 (94.8, 121.2)               | 125.8 (111.3, 142.2)                      | 114.8 (100.9, 130.6)                              | 128.5 (112.9, 146.1)                                   |
| Pakistani                     | 3060                              | 80945             | 3687.2                                     | 141 (129, 154.1)                  | 146.2 (133.7, 159.8)                      | 150.3 (136.8, 165.1)                              | 149.2 (135.6, 164.1)                                   |
| Bangladeshi                   | 85                                | 3580              | 2314                                       | 92.7 (68, 126.3)                  | 97.1 (71.3, 132.2)                        | 99.2 (72.7, 135.4)                                | 99.1 (72.7, 135.2)                                     |
| Other South Asian             | 340                               | 11045             | 2993.3                                     | 102.9 (87.2, 121.6)               | 104.6 (88.5, 123.6)                       | 109 (92.1, 129.1)                                 | 106.4 (89.8, 126)                                      |
| Caribbean                     | 150                               | 4865              | 3047.4                                     | 96.3 (72.2, 128.4)                | 106.9 (80.2, 142.6)                       | 100.9 (75.6, 134.5)                               | 108.3 (81.2, 144.6)                                    |
| African                       | 210                               | 7840              | 2600.6                                     | 94.6 (74.7, 119.9)                | 94.7 (74.6, 120.3)                        | 101.8 (80.1, 129.3)                               | 96.9 (76, 123.5)                                       |
| Black Scottish or Other Black | 100                               | 2725              | 3616.3                                     | 116.2 (83.2, 162.2)               | 111.1 (80.8, 153)                         | 119.7 (85.8, 167.1)                               | 112.1 (81.4, 154.3)                                    |
| Chinese                       | 655                               | 29535             | 2164.2                                     | 69.1 (61.7, 77.3)                 | 74.3 (66.4, 83.2)                         | 74.9 (66.5, 84.4)                                 | 76.3 (67.7, 85.9)                                      |

**Table 9: Age adjusted rates per 100,000 population (PY) and rate ratios (RR x100) for acute avoidable hospitalisations by sex and ethnic group. RRs are age, socio-economic status (SES) (household tenure, combined individual and household education and Scottish Index of Multiple Deprivation SIMD) and UK/ROI-born (versus born elsewhere) adjusted, with 95% confidence intervals.**

| <b>Ethnic group</b>           | <b>Acute avoidable hospitalisations</b> | <b>PY at risk</b> | <b>Age-adjusted rates (for 100,000 PY)</b> | <b>Age adjusted RR and 95% CI</b> | <b>Age and SES adjusted RR and 95% CI</b> | <b>Age and UK/ROI-born adjusted RR and 95% CI</b> | <b>Age, UK/ROI-born and SES adjusted RR and 95% CI</b> |
|-------------------------------|-----------------------------------------|-------------------|--------------------------------------------|-----------------------------------|-------------------------------------------|---------------------------------------------------|--------------------------------------------------------|
| <b>MALES</b>                  |                                         |                   |                                            |                                   |                                           |                                                   |                                                        |
| White Scottish                | 186920                                  | 12005945          | 1556.9                                     | 100                               | 100                                       | 100                                               | 100                                                    |
| Other White British           | 11925                                   | 825250            | 1409.3                                     | 82.1 (80.3, 84)                   | 91.5 (89.4, 93.6)                         | 82.5 (80.7, 84.4)                                 | 91.8 (89.7, 93.9)                                      |
| White Irish                   | 2290                                    | 115335            | 1936.6                                     | 107 (101.5, 112.9)                | 105.8 (100.3, 111.6)                      | 107.1 (101.5, 113)                                | 105.8 (100.3, 111.6)                                   |
| Other White                   | 1690                                    | 125325            | 1314.6                                     | 83.5 (78.1, 89.3)                 | 88.5 (82.7, 94.6)                         | 93.1 (86.6, 100)                                  | 95.8 (89.1, 103)                                       |
| Any Mixed Background          | 275                                     | 24860             | 1074.9                                     | 109.3 (94.3, 126.7)               | 109.1 (94.1, 126.5)                       | 113.6 (97.9, 131.7)                               | 112.2 (96.8, 130.2)                                    |
| Indian                        | 565                                     | 32490             | 1693.2                                     | 120.3 (100.3, 144.2)              | 136 (113.4, 163)                          | 133.6 (109.9, 162.5)                              | 147.3 (121.1, 179.2)                                   |
| Pakistani                     | 1185                                    | 77290             | 1492.9                                     | 123.2 (115, 132.1)                | 126.7 (118.2, 135.7)                      | 136.9 (126.9, 147.7)                              | 137.1 (127, 148.1)                                     |
| Bangladeshi                   | 70                                      | 4390              | 1600.5                                     | 137 (104.7, 179.4)                | 139.8 (107.1, 182.5)                      | 152.7 (116.4, 200.2)                              | 151.8 (116, 198.6)                                     |
| Other South Asian             | 150                                     | 12485             | 1187.6                                     | 91.9 (73.5, 115.1)                | 93.9 (75.1, 117.5)                        | 102.3 (81.4, 128.5)                               | 101.8 (81, 127.9)                                      |
| Caribbean                     | 25                                      | 3370              | 752.9                                      | 52.4 (30.8, 89.1)                 | 53.5 (31.5, 90.9)                         | 56.4 (33.2, 95.9)                                 | 56.5 (33.2, 96)                                        |
| African                       | 95                                      | 8160              | 1147.6                                     | 94.2 (75, 118.4)                  | 93.8 (74.6, 117.9)                        | 106.2 (84.2, 133.9)                               | 102.9 (81.6, 129.8)                                    |
| Black Scottish or Other Black | 35                                      | 2585              | 1357.6                                     | 113.7 (78.4, 164.7)               | 104.4 (71.9, 151.5)                       | 118 (81.4, 170.9)                                 | 107.3 (73.9, 155.8)                                    |
| Chinese                       | 275                                     | 25395             | 1056                                       | 76.9 (66.7, 88.6)                 | 78.7 (68.2, 90.7)                         | 85.4 (73.4, 99.2)                                 | 86.3 (74.4, 100.1)                                     |

| <b>Ethnic group</b>           | <b>Acute avoidable hospitalisations</b> | <b>PY at risk</b> | <b>Age-adjusted rates (for 100,000 PY)</b> | <b>Age adjusted RR and 95% CI</b> | <b>Age and SES adjusted RR and 95% CI</b> | <b>Age and UK/ROI-born adjusted RR and 95% CI</b> | <b>Age, UK/ROI-born and SES adjusted RR and 95% CI</b> |
|-------------------------------|-----------------------------------------|-------------------|--------------------------------------------|-----------------------------------|-------------------------------------------|---------------------------------------------------|--------------------------------------------------------|
| FEMALES                       |                                         |                   |                                            |                                   |                                           |                                                   |                                                        |
| White Scottish                | 237935                                  | 13669790          | 1740.6                                     | 100                               | 100                                       | 100                                               | 100                                                    |
| Other White British           | 14530                                   | 929145            | 1525.3                                     | 83.5 (81.7, 85.4)                 | 92.5 (90.5, 94.6)                         | 83.8 (82, 85.7)                                   | 92.6 (90.5, 94.7)                                      |
| White Irish                   | 2730                                    | 131325            | 2029                                       | 100.9 (96, 105.9)                 | 102.4 (97.5, 107.5)                       | 100.9 (96, 105.9)                                 | 102.8 (97.8, 108)                                      |
| Other White                   | 2155                                    | 156675            | 1341.5                                     | 76.6 (72.7, 80.8)                 | 83.7 (79.4, 88.3)                         | 81.4 (76.7, 86.4)                                 | 87.6 (82.2, 93.4)                                      |
| Any Mixed Background          | 390                                     | 29455             | 1298                                       | 99.8 (88.7, 112.3)                | 100.3 (89.1, 112.8)                       | 101.9 (90.5, 114.7)                               | 107.8 (93.9, 123.8)                                    |
| Indian                        | 535                                     | 31205             | 1665.9                                     | 108.2 (97.3, 120.4)               | 120.5 (108.3, 134)                        | 114.1 (102.3, 127.3)                              | 127.5 (113.5, 143.2)                                   |
| Pakistani                     | 1360                                    | 80945             | 1641.1                                     | 116.9 (108.7, 125.7)              | 119.3 (110.9, 128.3)                      | 122.6 (113.6, 132.3)                              | 126.1 (116.4, 136.7)                                   |
| Bangladeshi                   | 55                                      | 3580              | 1442.1                                     | 105.1 (70.5, 156.6)               | 106.7 (71.7, 159)                         | 111.2 (74.5, 165.9)                               | 122.2 (79.4, 188)                                      |
| Other South Asian             | 175                                     | 11045             | 1554                                       | 106.2 (87.6, 128.7)               | 107.6 (88.8, 130.4)                       | 111.5 (91.8, 135.2)                               | 117.3 (95, 144.9)                                      |
| Caribbean                     | 80                                      | 4865              | 1603.9                                     | 102.9 (75.3, 140.6)               | 109.3 (80, 149.5)                         | 106.7 (78.1, 145.8)                               | 111.6 (78.6, 158.5)                                    |
| African                       | 110                                     | 7840              | 1368.7                                     | 92.9 (72.8, 118.5)                | 92.5 (72.5, 118)                          | 98.9 (77.3, 126.5)                                | 98.9 (75.7, 129.2)                                     |
| Black Scottish or Other Black | 45                                      | 2725              | 1575.4                                     | 103.5 (73.6, 145.6)               | 100.9 (72, 141.3)                         | 106.2 (75.6, 149.3)                               | 110 (76.5, 158.1)                                      |
| Chinese                       | 350                                     | 29535             | 1152.3                                     | 75.1 (66.8, 84.3)                 | 78.8 (70.1, 88.5)                         | 80.2 (71.1, 90.5)                                 | 84.9 (74.6, 96.7)                                      |

**Table 10: Age adjusted rates per 100,000 population (PY) and rate ratios (RR x100) for chronic avoidable hospitalisations by sex and ethnic group. RRs are age, socio-economic status (SES) (household tenure, combined individual and household education and Scottish Index of Multiple Deprivation SIMD) and UK/ROI-born (versus born elsewhere) adjusted, with 95% confidence intervals.**

| <b>Ethnic group</b>           | <b>Chronic avoidable hospitalisations</b> | <b>PY at risk</b> | <b>Age-adjusted rates (for 100,000 PY)</b> | <b>Age adjusted RR and 95% CI</b> | <b>Age and SES adjusted RR and 95% CI</b> | <b>Age and UK/ROI-born adjusted RR and 95% CI</b> | <b>Age, UK/ROI-born and SES adjusted RR and 95% CI</b> |
|-------------------------------|-------------------------------------------|-------------------|--------------------------------------------|-----------------------------------|-------------------------------------------|---------------------------------------------------|--------------------------------------------------------|
| <b>MALES</b>                  |                                           |                   |                                            |                                   |                                           |                                                   |                                                        |
| White Scottish                | 344620                                    | 12005945          | 2870.4                                     | 100                               | 100                                       | 100                                               | 100                                                    |
| Other White British           | 23495                                     | 825250            | 2776.7                                     | 81 (78.9, 83.1)                   | 93.5 (91, 96)                             | 81.2 (79.1, 83.4)                                 | 93.5 (91.1, 96.1)                                      |
| White Irish                   | 4365                                      | 115335            | 3690.5                                     | 100.2 (94.4, 106.3)               | 97.2 (91.6, 103.1)                        | 100.2 (94.5, 106.4)                               | 97.2 (91.6, 103.1)                                     |
| Other White                   | 3065                                      | 125325            | 2386.1                                     | 84.7 (79.5, 90.1)                 | 92.2 (86.6, 98.1)                         | 90.8 (84.4, 97.8)                                 | 93.9 (87.1, 101.2)                                     |
| Any Mixed Background          | 340                                       | 24860             | 1333.9                                     | 106.8 (84.7, 134.8)               | 106 (84.2, 133.5)                         | 110.2 (87.2, 139.1)                               | 106.8 (84.7, 134.6)                                    |
| Indian                        | 870                                       | 32490             | 2614.8                                     | 110.5 (97.8, 124.9)               | 132.1 (116.9, 149.4)                      | 120.6 (105.9, 137.3)                              | 135.1 (118.6, 153.9)                                   |
| Pakistani                     | 2100                                      | 77290             | 2651.4                                     | 152.8 (139.9, 167)                | 158.4 (144.9, 173.1)                      | 166.8 (151.1, 184.2)                              | 162 (146.6, 179.2)                                     |
| Bangladeshi                   | 105                                       | 4390              | 2289.6                                     | 127.3 (97.2, 166.7)               | 134 (101.8, 176.5)                        | 138.4 (105.3, 182)                                | 136.9 (103.6, 180.8)                                   |
| Other South Asian             | 215                                       | 12485             | 1672.1                                     | 82.4 (66.3, 102.4)                | 86.9 (70, 107.9)                          | 89.1 (71.3, 111.3)                                | 88.6 (71, 110.5)                                       |
| Caribbean                     | 60                                        | 3370              | 1708.5                                     | 72.5 (54, 97.5)                   | 75.5 (56.1, 101.7)                        | 77.4 (57.5, 104.2)                                | 76.8 (56.9, 103.6)                                     |
| African                       | 130                                       | 8160              | 1542                                       | 94.6 (48, 186.3)                  | 97.8 (49.7, 192.4)                        | 103.1 (51.7, 205.6)                               | 100 (50.1, 199.4)                                      |
| Black Scottish or Other Black | 40                                        | 2585              | 1470.7                                     | 86.6 (54, 138.7)                  | 77.4 (47.9, 125.1)                        | 88.6 (55.2, 142.2)                                | 77.9 (48.2, 125.9)                                     |
| Chinese                       | 410                                       | 25395             | 1566.9                                     | 66.9 (55.8, 80.2)                 | 68.3 (57, 81.9)                           | 73.3 (60.8, 88.5)                                 | 70 (58, 84.5)                                          |

| <b>Ethnic group</b>           | <b>Chronic avoidable hospitalisations</b> | <b>PY at risk</b> | <b>Age-adjusted rates (for 100,000 PY)</b> | <b>Age adjusted RR and 95% CI</b> | <b>Age and SES adjusted RR and 95% CI</b> | <b>Age and UK/ROI-born adjusted RR and 95% CI</b> | <b>Age, UK/ROI-born and SES adjusted RR and 95% CI</b> |
|-------------------------------|-------------------------------------------|-------------------|--------------------------------------------|-----------------------------------|-------------------------------------------|---------------------------------------------------|--------------------------------------------------------|
| <b>FEMALES</b>                |                                           |                   |                                            |                                   |                                           |                                                   |                                                        |
| White Scottish                | 301935                                    | 13669790          | 2208.8                                     | 100                               | 100                                       | 100                                               | 100                                                    |
| Other White British           | 17565                                     | 929145            | 1844.1                                     | 75.1 (72.6, 77.6)                 | 91.3 (88.4, 94.4)                         | 75.4 (72.9, 77.9)                                 | 91.4 (88.4, 94.5)                                      |
| White Irish                   | 3870                                      | 131325            | 2873.5                                     | 94.9 (88.6, 101.7)                | 94.5 (88.2, 101.3)                        | 94.9 (88.6, 101.7)                                | 94.5 (88.2, 101.3)                                     |
| Other White                   | 2715                                      | 156675            | 1688.9                                     | 77 (69.8, 84.9)                   | 90.5 (82.1, 99.8)                         | 84.3 (75.4, 94.1)                                 | 92 (82.2, 102.9)                                       |
| Any Mixed Background          | 335                                       | 29455             | 1105.9                                     | 96.9 (77.3, 121.4)                | 93.9 (74.9, 117.6)                        | 100.2 (79.9, 125.8)                               | 94.4 (75.2, 118.4)                                     |
| Indian                        | 540                                       | 31205             | 1687.8                                     | 106.1 (87, 129.3)                 | 130.4 (106.9, 159)                        | 116.8 (94.4, 144.5)                               | 132.7 (107.2, 164.3)                                   |
| Pakistani                     | 1700                                      | 80945             | 2047.2                                     | 168.5 (145.7, 194.8)              | 176.8 (152.9, 204.5)                      | 184.9 (157.5, 217.2)                              | 179.9 (152.7, 211.9)                                   |
| Bangladeshi                   | 30                                        | 3580              | 871.3                                      | 77.2 (47.9, 124.4)                | 83.1 (51.4, 134.5)                        | 84.6 (52.4, 136.5)                                | 84.5 (52, 137.3)                                       |
| Other South Asian             | 165                                       | 11045             | 1456.9                                     | 100.4 (77.6, 129.8)               | 102.3 (78.9, 132.5)                       | 108.2 (83.2, 140.7)                               | 103.6 (79.6, 135)                                      |
| Caribbean                     | 70                                        | 4865              | 1443.5                                     | 89.5 (56.2, 142.4)                | 104.7 (65.7, 166.6)                       | 95.4 (59.8, 152.1)                                | 105.8 (66.3, 168.8)                                    |
| African                       | 100                                       | 7840              | 1231.9                                     | 96.3 (65, 142.7)                  | 98.5 (66.2, 146.5)                        | 105.7 (70.9, 157.5)                               | 100.2 (66.9, 150)                                      |
| Black Scottish or Other Black | 55                                        | 2725              | 2040.9                                     | 127.7 (79, 206.3)                 | 120 (75.8, 190.1)                         | 132.5 (81.9, 214.4)                               | 120.8 (76.2, 191.5)                                    |
| Chinese                       | 305                                       | 29535             | 1014.3                                     | 63.1 (52.5, 75.9)                 | 68.8 (57.2, 82.7)                         | 70.3 (57.8, 85.6)                                 | 70.2 (57.6, 85.5)                                      |



**Figure: Odds ratios for unplanned readmissions by ethnic group in Scotland for males and females**

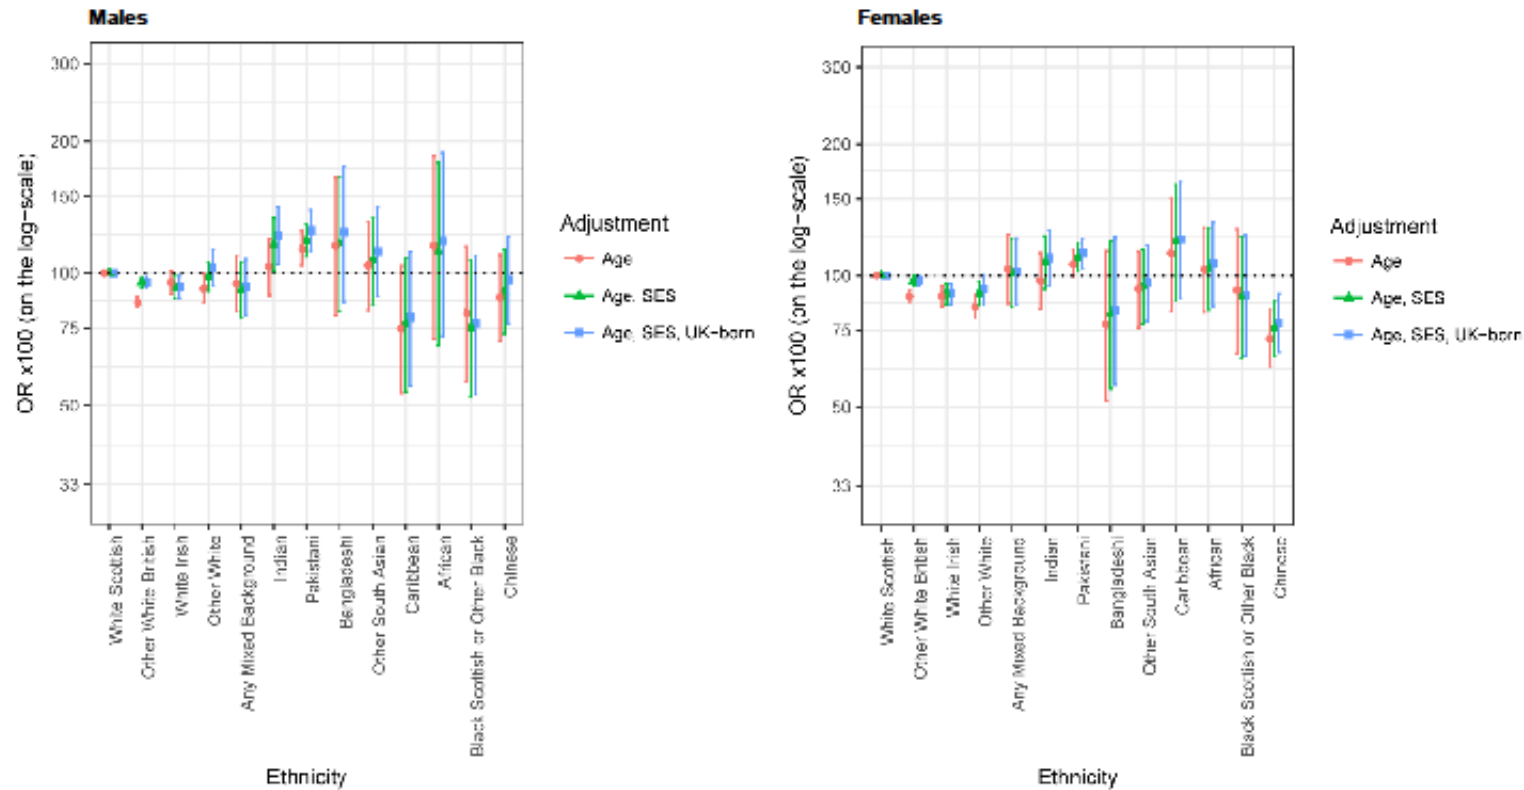

Results shown adjusted for a) age; b) age and socioeconomic status (SES); and c) age, SES and country of birth (CoB). Odds ratios (ORs) have been multiplied by 100, with the White Scottish group as the reference category.

**Table 11: Number per 100,000 hospitalisations and Odds Ratios (OR x100) for unplanned readmissions by sex and ethnic group. ORs are age, socio-economic status (SES) (household tenure, combined individual and household education and Scottish Index of Multiple Deprivation SIMD) and UK/ROI-born (versus born elsewhere) adjusted, with 95% confidence intervals.**

| <b>Ethnic group</b>           | <b>Emergency readmissions</b> | <b>Hospitalisations</b> | <b>Number per 100,000</b> | <b>Age adjusted OR and 95% CI</b> | <b>Age and SES adjusted OR and 95% CI</b> | <b>Age and UK/ROI-born adjusted OR and 95% CI</b> | <b>Age, UK/ROI-born and SES adjusted OR and 95% CI</b> |
|-------------------------------|-------------------------------|-------------------------|---------------------------|-----------------------------------|-------------------------------------------|---------------------------------------------------|--------------------------------------------------------|
| <b>MALES</b>                  |                               |                         |                           |                                   |                                           |                                                   |                                                        |
| White Scottish                | 269370                        | 3750625                 | 7182                      | 100.0                             | 100.0                                     | 100.0                                             | 100.0                                                  |
| Other White British           | 16570                         | 265250                  | 6177.5                    | 86 (83.4, 88.7)                   | 95.3 (92.5, 98.1)                         | 86.4 (83.8, 89)                                   | 95.5 (92.7, 98.3)                                      |
| White Irish                   | 3150                          | 44950                   | 6834.2                    | 95.2 (89.7, 101)                  | 93 (87.7, 98.6)                           | 95.2 (89.7, 101)                                  | 93 (87.8, 98.6)                                        |
| Other White                   | 2450                          | 36815                   | 6639                      | 92.4 (85.7, 99.6)                 | 98 (91.1, 105.4)                          | 100.2 (91, 110.3)                                 | 103 (93.7, 113.1)                                      |
| Any Mixed Background          | 295                           | 4625                    | 6810.8                    | 94.8 (81.7, 109.9)                | 91.5 (79,105.8)                           | 97.4 (83.8, 112.9)                                | 93 (80.2, 107.5)                                       |
| Indian                        | 660                           | 9140                    | 7417.7                    | 103.3 (89.1, 119.5)               | 116.1 (100.7, 133.4)                      | 112.5 (95.9, 131.7)                               | 122.2 (104.7, 142.1)                                   |
| Pakistani                     | 1555                          | 19770                   | 8176.2                    | 113.8 (104, 124.6)                | 118.8 (108.9, 129.5)                      | 124 (111.1, 138.1)                                | 125.2 (112.6, 139.1)                                   |
| Bangladeshi                   | 75                            | 930                     | 8308.9                    | 115.7 (79.9, 165)                 | 117.2 (81.6, 165.4)                       | 126.8 (87.4, 180.9)                               | 123.9 (86.1, 175)                                      |
| Other South Asian             | 230                           | 3235                    | 7478.1                    | 104.1 (82.2, 131.2)               | 107 (84.9, 133.9)                         | 112.6 (88.5, 142.4)                               | 112.1 (88.5, 141)                                      |
| Caribbean                     | 50                            | 940                     | 5365.9                    | 74.7 (53.3, 103.9)                | 76.7 (53.7, 108.2)                        | 78.9 (55.9, 110.2)                                | 79.1 (55.2, 112.1)                                     |
| African                       | 135                           | 1740                    | 8307.2                    | 115.7 (70.6, 184.3)               | 112.1 (68.3, 178.2)                       | 126.5 (77.2, 201.2)                               | 118.5 (71.9, 188.7)                                    |
| Black Scottish or Other Black | 40                            | 735                     | 5827.4                    | 81.1 (56.6, 115.1)                | 75.2 (52.2, 107)                          | 83.7 (58.3, 118.9)                                | 76.6 (53.1, 109.2)                                     |
| Chinese                       | 350                           | 5705                    | 6333.7                    | 88.2 (70.2, 110.3)                | 91 (72.8, 113.1)                          | 97.3 (76.9, 122.4)                                | 96.7 (76.7, 121)                                       |

| Ethnic group                  | Emergency readmissions | Hospitalisations | Number per 100,000 | Age adjusted OR and 95% CI | Age and SES adjusted OR and 95% CI | Age and UK/ROI-born adjusted OR and 95% CI | Age, UK/ROI-born and SES adjusted OR and 95% CI |
|-------------------------------|------------------------|------------------|--------------------|----------------------------|------------------------------------|--------------------------------------------|-------------------------------------------------|
| FEMALES                       |                        |                  |                    |                            |                                    |                                            |                                                 |
| White Scottish                | 268025                 | 4354330          | 6155.3             | 100.0                      | 100.0                              | 100.0                                      | 100.0                                           |
| Other White British           | 16440                  | 300020           | 5518.5             | 89.7 (87.2, 92.2)          | 97.3 (94.6, 100)                   | 89.9 (87.4, 92.4)                          | 97.4 (94.7, 100.1)                              |
| White Irish                   | 2800                   | 49485            | 5526.7             | 89.8 (84.9, 94.9)          | 90.9 (86, 96)                      | 89.8 (84.9, 94.9)                          | 90.9 (86, 96)                                   |
| Other White                   | 2425                   | 46575            | 5234.8             | 85 (79.7, 90.7)            | 91 (85.4, 96.9)                    | 89.4 (82.6, 96.6)                          | 93.2 (86.1, 100.7)                              |
| Any Mixed Background          | 400                    | 6345             | 6370.8             | 103.5 (86.2, 123.9)        | 101.6 (85, 121)                    | 105.1 (87.5, 125.9)                        | 102.3 (85.6, 122)                               |
| Indian                        | 500                    | 8590             | 5983.3             | 97.2 (83.8, 112.6)         | 107.3 (93.1, 123.4)                | 101.9 (87.4, 118.5)                        | 109.7 (94.7, 126.8)                             |
| Pakistani                     | 1440                   | 22710            | 6541.5             | 106.3 (98.8, 114.2)        | 110 (102.4, 118.1)                 | 111 (102.4, 120.1)                         | 112.4 (103.8, 121.7)                            |
| Bangladeshi                   | 35                     | 745              | 4749.4             | 77.2 (51.7, 113.9)         | 81.7 (55.1, 119.6)                 | 80.7 (54.1, 119)                           | 83.5 (56.3, 122.3)                              |
| Other South Asian             | 160                    | 2890             | 5736.8             | 93.2 (76, 113.8)           | 94.4 (77.3, 114.7)                 | 97 (78.9, 118.8)                           | 96.2 (78.6, 117.2)                              |
| Caribbean                     | 105                    | 1575             | 6919.6             | 112.4 (82.9, 151)          | 119.7 (87.7, 161.6)                | 115.4 (84.8, 155.5)                        | 121.2 (88.6, 163.7)                             |
| African                       | 140                    | 2270             | 6365.7             | 103.4 (82.6, 128.9)        | 104 (83.5, 128.7)                  | 108.6 (86.5, 135.7)                        | 106.5 (85.2, 132.3)                             |
| Black Scottish or Other Black | 40                     | 680              | 5701.3             | 92.6 (66.5, 127.8)         | 89.5 (64.7, 122.6)                 | 94.5 (68, 130.2)                           | 90.3 (65.3, 123.7)                              |
| Chinese                       | 300                    | 7050             | 4421.3             | 71.8 (61.7, 83.5)          | 75.8 (65.3, 87.8)                  | 76.1 (65, 89.1)                            | 78 (66.7, 90.9)                                 |

**Table 12: Length of stay for malignant neoplasm of bronchus and lung (C34), chronic ischaemic heart disease (I25) and Pneumonia, organism unspecified (J18) by sex and ethnic group. Lengths of stay (derived by exponentiating logged lengths of stay) are age adjusted, with 95% confidence intervals, from linear regression models.**

|                                  | Hospitalisations<br>C34 | Age<br>adjusted<br>mean<br>differences<br>in length of<br>stay (days) | Coefficient (x100)<br>for age adjusted<br>length of stay<br>and 95% CI | Hospitalisations<br>I25 | Age<br>adjusted<br>mean<br>differences<br>in length of<br>stay (days) | Coefficient (x100)<br>for age adjusted<br>length of stay<br>and 95% CI | Hospitalisations<br>J18 | Age<br>adjusted<br>mean<br>differences<br>in length<br>of stay<br>(days) | Coefficient (x100)<br>for age adjusted<br>length of stay and<br>95% CI |
|----------------------------------|-------------------------|-----------------------------------------------------------------------|------------------------------------------------------------------------|-------------------------|-----------------------------------------------------------------------|------------------------------------------------------------------------|-------------------------|--------------------------------------------------------------------------|------------------------------------------------------------------------|
| MALES                            |                         |                                                                       |                                                                        |                         |                                                                       |                                                                        |                         |                                                                          |                                                                        |
| White Scottish                   | 71040                   | 1.7672                                                                | 100                                                                    | 71590                   | 1.3326                                                                | 100                                                                    | 47165                   | 6.2332                                                                   | 100                                                                    |
| Other White<br>British           | 4750                    | 1.613                                                                 | 84.0 (75.5, 93.4)                                                      | 5615                    | 1.3024                                                                | 92.0 (86.7, 97.6)                                                      | 3085                    | 5.9786                                                                   | 97.7 (88.3, 108.1)                                                     |
| White Irish                      | 845                     | 1.7194                                                                | 95.2 (80.5, 112.6)                                                     | 895                     | 1.3635                                                                | 108.0 (90.6, 128.8)                                                    | 695                     | 6.274                                                                    | 100.4 (89.9, 112.1)                                                    |
| Other White                      | 605                     | 1.6232                                                                | 85.1 (70.3, 103.0)                                                     | 710                     | 1.2943                                                                | 89.8 (77.8, 103.8)                                                     | 500                     | 5.853                                                                    | 96.6 (83.5, 111.7)                                                     |
| Any Mixed<br>Background          | 45                      | 1.7889                                                                | 102.1 (61.4, 170.0)                                                    | 60                      | 1.3417                                                                | 102.4 (65.2, 160.7)                                                    | 50                      | 7.2426                                                                   | 108.2 (67.3, 173.9)                                                    |
| Indian                           | 50                      | 1.7692                                                                | 100.2 (57.2, 175.7)                                                    | 270                     | 1.2313                                                                | 72.5 (59.7, 88.0)                                                      | 70                      | 4.3996                                                                   | 81.0 (62.5, 104.9)                                                     |
| Pakistani                        | 105                     | 1.6138                                                                | 84.1 (57.7, 122.5)                                                     | 660                     | 1.3487                                                                | 104.2 (84.4, 128.5)                                                    | 175                     | 5.982                                                                    | 97.8 (74.2, 128.7)                                                     |
| Bangladeshi                      | .                       | .                                                                     | .                                                                      | 35                      | 1.2783                                                                | 85.5 (53.4, 137.0)                                                     | 10                      | 4.6704                                                                   | 84.2 (40.7, 174.4)                                                     |
| Other South Asian                | 10                      | 1.2845                                                                | 44.0 (37.3, 51.8)                                                      | 70                      | 1.28                                                                  | 86.0 (55.5, 133.2)                                                     | 30                      | 4.4115                                                                   | 81.1 (57.6, 114.3)                                                     |
| Caribbean                        | 10                      | 1.8708                                                                | 110.0 (60.6, 199.7)                                                    | 15                      | 1.2086                                                                | 66.0 (35.5, 122.6)                                                     | .                       | .                                                                        | .                                                                      |
| African                          | .                       | .                                                                     | .                                                                      | 15                      | 1.4177                                                                | 121.5 (39.1, 377.8)                                                    | 15                      | 3.6238                                                                   | 70.4 (49.4, 100.1)                                                     |
| Black Scottish or<br>Other Black | 10                      | 3.2567                                                                | 207.4 (119.7,<br>359.2)                                                | 10                      | 1.5205                                                                | 145.9 (76.7, 277.6)                                                    | 10                      | 9.524                                                                    | 123.2 (72.7, 208.6)                                                    |
| Chinese                          | 80                      | 1.9248                                                                | 115.0 (81.1, 163.1)                                                    | 75                      | 1.2746                                                                | 84.5 (61.9, 115.3)                                                     | 55                      | 7.0003                                                                   | 106.3 (80.6, 140.4)                                                    |

|                               | Hospitalisations C34 | Age adjusted mean differences in length of stay (days) | Coefficient (x100) for age adjusted length of stay and 95% CI | Hospitalisations I25 | Age adjusted mean differences in length of stay (days) | Coefficient (x100) for age adjusted length of stay and 95% CI | Hospitalisations J18 | Age adjusted mean differences in length of stay (days) | Coefficient (x100) for age adjusted length of stay and 95% CI |
|-------------------------------|----------------------|--------------------------------------------------------|---------------------------------------------------------------|----------------------|--------------------------------------------------------|---------------------------------------------------------------|----------------------|--------------------------------------------------------|---------------------------------------------------------------|
| FEMALES                       |                      |                                                        |                                                               |                      |                                                        |                                                               |                      |                                                        |                                                               |
| White Scottish                | 62880                | 1.85                                                   | 100                                                           | 33685                | 1.3036                                                 | 100                                                           | 48155                | 6.7319                                                 | 100                                                           |
| Other White British           | 3130                 | 1.9153                                                 | 105.6 (92.5, 120.6)                                           | 2095                 | 1.2673                                                 | 89.4 (81.0, 98.6)                                             | 2935                 | 5.042                                                  | 84.8 (79.9, 90.1)                                             |
| White Irish                   | 760                  | 1.8814                                                 | 102.7 (87.0, 121.3)                                           | 390                  | 1.2996                                                 | 98.9 (72.7, 134.4)                                            | 665                  | 4.8763                                                 | 83.1 (74.4, 92.8)                                             |
| Other White                   | 500                  | 2.0584                                                 | 117.3 (84.8, 162.4)                                           | 290                  | 1.2552                                                 | 85.7 (64.9, 113.3)                                            | 410                  | 5.676                                                  | 91.1 (78.9, 105.0)                                            |
| Any Mixed Background          | 15                   | 2.9038                                                 | 173.3 (111.3, 269.7)                                          | 25                   | 1.2046                                                 | 70.2 (40.6, 121.3)                                            | 65                   | 4.1133                                                 | 74.2 (54.3, 101.3)                                            |
| Indian                        | 10                   | 1.1647                                                 | 24.8 (11.3, 54.2)                                             | 70                   | 1.2644                                                 | 88.5 (36.2, 216.5)                                            | 50                   | 3.0353                                                 | 58.2 (43.5, 77.9)                                             |
| Pakistani                     | 45                   | 1.7478                                                 | 90.8 (55.7, 148.0)                                            | 175                  | 1.2662                                                 | 89.0 (67.4, 117.6)                                            | 125                  | 4.45                                                   | 78.3 (59.2, 103.6)                                            |
| Bangladeshi                   |                      |                                                        |                                                               | 10                   | 1.059                                                  | 21.6 (17.0, 27.4)                                             | .                    | .                                                      | .                                                             |
| Other South Asian             | 35                   | 1.2915                                                 | 41.6 (31.5, 54.8)                                             | 25                   | 1.3775                                                 | 120.8 (60.1, 243.0)                                           | 25                   | 4.0194                                                 | 73.0 (47.4, 112.2)                                            |
| Caribbean                     |                      |                                                        |                                                               | .                    | .                                                      | .                                                             | 10                   | 4.7323                                                 | 81.5 (50.1, 132.7)                                            |
| African                       | 10                   | 2.3265                                                 | 137.2 (60.2, 312.8)                                           | 10                   | 1.198                                                  | 68.1 (18.0, 258.0)                                            | 10                   | 12.189                                                 | 131.1 (75.7, 227.2)                                           |
| Black Scottish or Other Black |                      |                                                        |                                                               | .                    | .                                                      | .                                                             | .                    | .                                                      | .                                                             |
| Chinese                       | 95                   | 2.862                                                  | 170.9 (89.7, 325.5)                                           | 25                   | 1.1234                                                 | 43.9 (21.3, 90.3)                                             | 35                   | 6.107                                                  | 94.9 (67.9, 132.6)                                            |
